# Supplementary material for: Monocyte-derived exosomes upon exposure to cigarette smoke condensate alter their characteristics and show protective effect against cytotoxicity and HIV-1 replication
Source: PubMed Central journal article supplement (PMC5701054; doi:10.1038/s41598-017-16301-9), 2017-11-23
Supplement: 41598_2017_16301_MOESM1_ESM.pdf [file 41598_2017_16301_MOESM1_ESM.pdf]

## Supplementary figures

### **Monocyte-derived exosomes upon exposure to cigarette smoke condensate alter their characteristics and show protective effect against cytotoxicity and HIV-1 replication**

Sanjana Haque<sup>1</sup>, Namita Sinha<sup>1</sup>, Sabina Ranjit<sup>1</sup>, Narasimha M. Midde<sup>1</sup>, Fatah Kashanchi<sup>2</sup>, and Santosh Kumar<sup>1\*</sup>

<sup>1</sup>Department of Pharmaceutical Sciences, College of Pharmacy, University of Tennessee Health Science Center, Memphis, TN 38163

<sup>2</sup>Laboratory of Molecular Virology, George Mason University, Manassas, VA 20110

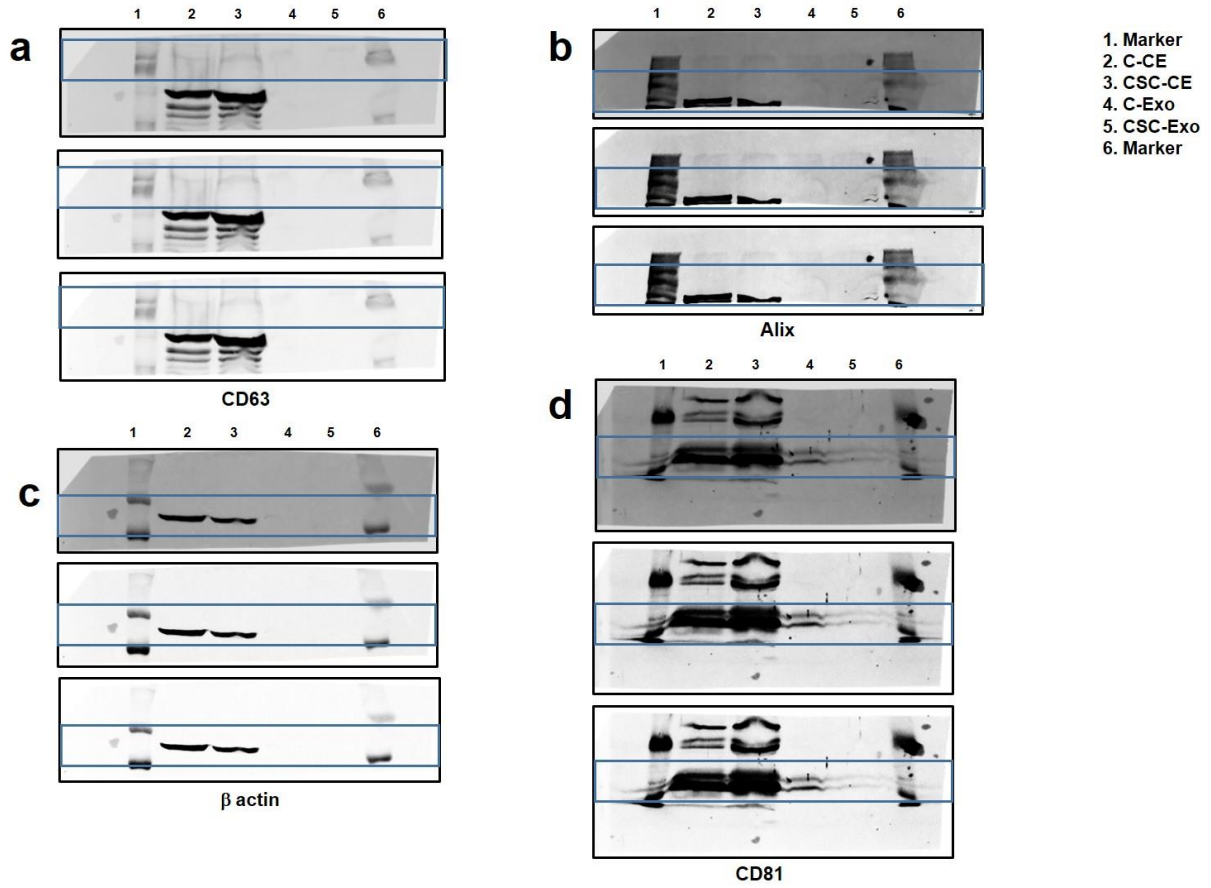

**Supplementary figure 1: Western blot of exosomal and cellular marker proteins. (a) CD63 (b) Alix (c)  $\beta$  actin (d) CD81.** Each blot is presented in original and multiple contrast exposure sequentially from top to bottom.

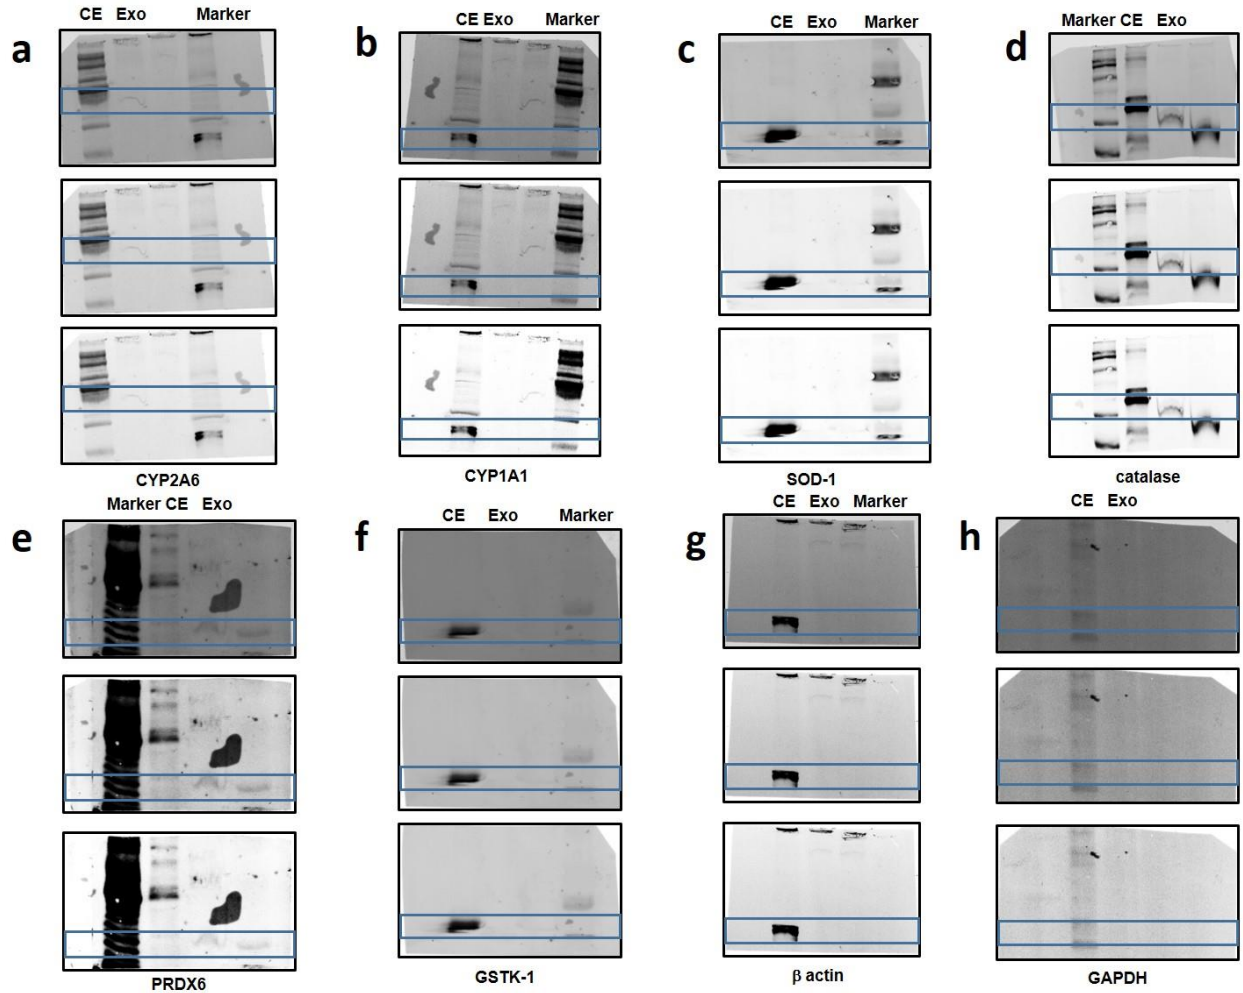

**Supplementary figure 2: Representative immunoblots for the expression of exosomal CYPs and AOE compared to cell extracts. (a) CYP2A6 (b) CYP1A1 (c) SOD-1 (d) catalase (e) PRDX6 (f) GSTK-1 (g)  $\beta$  actin (h) GAPDH.** Each blot is presented in original and multiple contrast exposure sequentially from top to bottom. CE: cell extract, Exo: exosomes

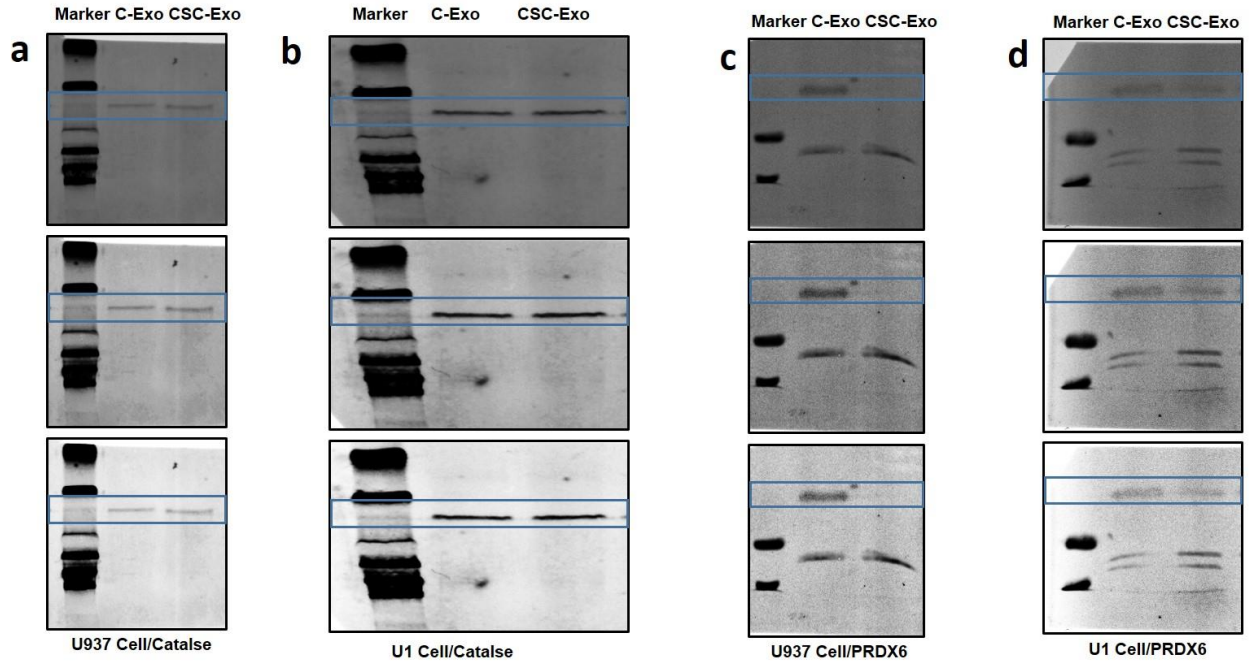

**Supplementary figure 3: Effect of CSC on specific AOE levels in exosomes isolated from U1 and U937 cells. (a) catalase from U937 cell extract and exosomes (b) catalase from U1 cell extract and exosomes (c) PRDX6 from U937 cell extract and exosomes (d) PRDX6 from U1 cell extract and exosomes. Each blot is presented in original and multiple contrast exposures sequentially from top to bottom. CE: cell extract, Exo: exosomes.**
